# Supplementary material for: Expression of Piwi, MMP, TIMP, and Sox during Gut Regeneration in Holothurian Eupentacta fraudatrix (Holothuroidea, Dendrochirotida)
Source: MDPI journal article supplement (doi:10.3390/genes12081292), 2021-08-23
Supplement: s1 [file s1]

**Table S1. Sequences of gene-specific PCR primers**

| Primer                       | Sequence                       |
|------------------------------|--------------------------------|
| Piwi F                       | 5' TAGAATACACCCAGAAGTGGCAGG 3' |
| Piwi R                       | 5' CTTCACTGGCACAGTGGAGACAA 3'  |
| MMP16 F                      | 5' GCCTTGGCTTTCATCTGCG 3'      |
| MMP16 R                      | 5' ACCCCCTGAGACTTACCTCT 3'     |
| 72 kDa type IV collagenase F | 5' CGAATGATGATGTCCGAAAT 3'     |
| 72 kDa type IV collagenase R | 5' ACTGACAGTAGCGCGTGC 3'       |
| tensilin3 F                  | 5' GTAGCCATTGCTTTACGACGC 3'    |
| tensilin3 R                  | 5' CTGTATCTTCTGACGCTCCTGC 3'   |
| Sox 17 F                     | 5' GGCATCCAAATCAACTCATCCA 3'   |
| Sox 17 R                     | 5' CCTATGGTCCGCTATCTAAGTC 3'   |
| Sox 9/10 F                   | 5' ACGGATACGACTGGTCAACGA 3'    |
| Sox 9/10 R                   | 5' TTACCTGTGCGCTTCCGCTA 3'     |
